# Supplementary material for: Signatures of counter-ion association and hydrogen bonding in vibrational circular dichroism spectra
Source: Royal Society of Chemistry journal article supplement (doi:10.1039/c0cp02701d), 2011-01-01
Supplement: c0cp02701d.pdf [file c0cp02701d.pdf]

# Signatures of counter ion association and hydrogen bonding in vibrational circular dichroism spectra

Valentin Paul Nicu<sup>†1</sup>, Mojgan Heshmat<sup>†</sup> and Evert Jan Baerends<sup>†‡2</sup>

<sup>†</sup> Theoretical Chemistry, Vrije Universiteit Amsterdam, De Boelelaan 1083, 1081 HV Amsterdam, The Netherlands

<sup>‡</sup> WCU program, Dep. of Chemistry, Pohang University of Science and Technology, San 31, Hyojadong, Namgu Pohang 790-784, South-Korea

---

<sup>1</sup>email: nicu@few.vu.nl

<sup>2</sup>email: baerends@few.vu.nl

**Table 1:** Frequencies (Freq.), dipole strengths (Dip. Str.), rotational strengths (Rot. Str. ), angle  $\xi$  (Xi), and normal mode overlaps for the modes indicated by arrows in Fig. 4 in the manuscript. The label of the normal modes (NM) are the same as in Fig. 4. The differences (Diff.) between the values taken in the free molecule (FM) and in the molecular complexes are also given for all listed physical quantities.

**Molecular labels:**

FM =  $\Lambda - \delta\delta\delta$ ; 2Cl =  $\Lambda - \delta\delta\delta \cdots 2\text{Cl}^-$ ; 3Cl =  $\Lambda - \delta\delta\delta \cdots 3\text{Cl}^-$ ; 5Cl =  $\Lambda - \delta\delta\delta \cdots 5\text{Cl}^-$

**Units:** Freq. ( $\text{cm}^{-1}$ ), R( $10^{-44}$  esu $^2 \cdot \text{cm}^2$ ), D( $10^{-40}$  esu $^2 \cdot \text{cm}^2$ ),  $\xi$  (degree).

| Molec. | NM | Freq.  | Diff. | Dip. Str. | Diff. | Rot. Str. | Diff. | Xi  | Diff. | Overlap |
|--------|----|--------|-------|-----------|-------|-----------|-------|-----|-------|---------|
| FM     | 52 | 1069.2 | ---   | 7.0       | ---   | 113.1     | ---   | 0.4 | ---   | ---     |
| 2Cl    | 58 | 1074.1 | 5.0   | 38.3      | 31.4  | 234.8     | 121.7 | 0.3 | -0.1  | -0.99   |
| 5Cl    | 67 | 1126.4 | 57.3  | 1.8       | -5.2  | 31.5      | -81.5 | 3.4 | 3.0   | 0.96    |

| Molec. | NM | Freq.  | Diff. | Dip. Str. | Diff. | Rot. Str. | Diff. | Xi    | Diff.  | Overlap |
|--------|----|--------|-------|-----------|-------|-----------|-------|-------|--------|---------|
| FM     | 55 | 1121.7 | ---   | 138.8     | ---   | -97.9     | ---   | 179.7 | ---    | ---     |
| 2Cl    | 61 | 1152.8 | 31.1  | 254.5     | 115.7 | 75.6      | 173.4 | 0.5   | -179.2 | 0.94    |

| Molec. | NM | Freq.  | Diff. | Dip. Str. | Diff. | Rot. Str. | Diff. | Xi    | Diff.  | Overlap |
|--------|----|--------|-------|-----------|-------|-----------|-------|-------|--------|---------|
| FM     | 56 | 1122.2 | ---   | 139.1     | ---   | -91.7     | ---   | 179.8 | ---    | ---     |
| 2Cl    | 62 | 1153.4 | 31.2  | 252.7     | 113.6 | 84.5      | 176.2 | 0.9   | -178.9 | 0.94    |

| Molec. | NM | Freq.  | Diff. | Dip. Str. | Diff. | Rot. Str. | Diff. | Xi    | Diff. | Overlap |
|--------|----|--------|-------|-----------|-------|-----------|-------|-------|-------|---------|
| FM     | 58 | 1175.8 | ---   | 0.5       | ---   | 19.4      | ---   | 3.2   | ---   | ---     |
| 5Cl    | 73 | 1212.1 | 36.2  | 4.8       | 4.4   | -74.5     | -93.9 | 179.0 | 175.7 | 0.98    |

| Molec. | NM | Freq.  | Diff. | Dip. Str. | Diff. | Rot. Str. | Diff. | Xi    | Diff. | Overlap |
|--------|----|--------|-------|-----------|-------|-----------|-------|-------|-------|---------|
| FM     | 59 | 1176.1 | ---   | 0.6       | ---   | 22.8      | ---   | 3.1   | ---   | ---     |
| 5Cl    | 74 | 1212.5 | 36.3  | 4.6       | 4.0   | -73.3     | -96.1 | 179.0 | 175.8 | 0.98    |

| Molec. | NM  | Freq.  | Diff. | Dip. Str. | Diff.  | Rot. Str. | Diff.  | Xi    | Diff.  | Overlap |
|--------|-----|--------|-------|-----------|--------|-----------|--------|-------|--------|---------|
| 1FM    | 60  | 1205.7 | ---   | 76.9      | ---    | 195.5     | ---    | 0.6   | ---    | ---     |
| 22C1   | 68  | 1261.2 | 55.6  | 325.4     | 248.6  | -410.0    | -605.4 | 178.8 | 178.2  | 0.93    |
| 33C1   | 69  | 1210.1 | 4.4   | 56.3      | -20.6  | 151.4     | -44.1  | 1.5   | 0.9    | -0.91   |
| 45C1   | 75  | 1244.9 | 39.2  | 124.4     | 47.6   | -171.5    | -367.0 | 179.2 | 178.7  | -0.98   |
| Molec. | NM  | Freq.  | Diff. | Dip. Str. | Diff.  | Rot. Str. | Diff.  | Xi    | Diff.  | Overlap |
| 1FM    | 82  | 1591.9 | ---   | 161.8     | ---    | -356.9    | ---    | 179.8 | ---    | ---     |
| 22C1   | 88  | 1586.5 | -5.4  | 46.8      | -115.0 | -189.7    | 167.2  | 179.0 | -0.9   | 0.98    |
| 33C1   | 91  | 1568.5 | -23.4 | 67.2      | -94.5  | 47.3      | 404.1  | 0.3   | -179.5 | 0.97    |
| 45C1   | 97  | 1586.5 | -5.4  | 12.2      | -149.6 | -26.9     | 330.0  | 179.5 | -0.3   | 0.99    |
| Molec. | NM  | Freq.  | Diff. | Dip. Str. | Diff.  | Rot. Str. | Diff.  | Xi    | Diff.  | Overlap |
| 1FM    | 83  | 1612.0 | ---   | 76.4      | ---    | 62.3      | ---    | 0.7   | ---    | ---     |
| 22C1   | 90  | 1613.6 | 1.6   | 9.6       | -66.8  | 56.4      | -6.0   | 1.3   | 0.5    | 0.98    |
| 33C1   | 92  | 1579.1 | -32.9 | 0.9       | -75.5  | 8.2       | -54.2  | 2.5   | 1.8    | 0.97    |
| 45C1   | 99  | 1604.7 | -7.3  | 0.6       | -75.8  | -9.2      | -71.5  | 175.1 | 174.4  | -0.97   |
| Molec. | NM  | Freq.  | Diff. | Dip. Str. | Diff.  | Rot. Str. | Diff.  | Xi    | Diff.  | Overlap |
| 1FM    | 84  | 1612.1 | ---   | 76.1      | ---    | 61.9      | ---    | 0.6   | ---    | ---     |
| 22C1   | 91  | 1614.1 | 2.1   | 9.8       | -66.3  | 56.6      | -5.3   | 3.1   | 2.4    | 0.98    |
| 33C1   | 93  | 1579.1 | -33.0 | 1.0       | -75.1  | 8.4       | -53.5  | 1.2   | 0.6    | -0.97   |
| 45C1   | 100 | 1604.8 | -7.3  | 0.6       | -75.4  | -9.7      | -71.6  | 171.9 | 171.3  | 0.97    |
| Molec. | NM  | Freq.  | Diff. | Dip. Str. | Diff.  | Rot. Str. | Diff.  | Xi    | Diff.  | Overlap |
| 1FM    | 86  | 1626.4 | ---   | 55.0      | ---    | 131.6     | ---    | 0.3   | ---    | ---     |
| 22C1   | 92  | 1624.9 | -1.5  | 5.1       | -49.9  | -0.8      | -132.4 | 160.7 | 160.4  | -0.98   |
| 33C1   | 95  | 1594.4 | -32.1 | 58.1      | 3.1    | -104.4    | -236.0 | 179.8 | 179.5  | -0.97   |
| 45C1   | 101 | 1615.7 | -10.7 | 41.4      | -13.6  | -21.0     | -152.7 | 177.5 | 177.2  | -0.99   |
| Molec. | NM  | Freq.  | Diff. | Dip. Str. | Diff.  | Rot. Str. | Diff.  | Xi    | Diff.  | Overlap |
| FM     | 87  | 1626.5 | ---   | 54.8      | ---    | 131.5     | ---    | 0.2   | ---    | ---     |
| 2C1    | 93  | 1625.5 | -1.0  | 5.4       | -49.3  | -0.1      | -131.6 | 94.9  | 94.6   | -0.98   |
| 3C1    | 96  | 1594.4 | -32.1 | 58.3      | 3.5    | -104.1    | -235.6 | 179.7 | 179.4  | 0.97    |
| 5C1    | 102 | 1615.9 | -10.6 | 41.5      | -13.2  | -21.6     | -153.1 | 176.3 | 176.1  | 0.99    |

**Table 2:** Comparison of the Cartesian components of the electronic (el) and nuclear (nuc) components of the EDTM and MDTM of the modes: 60 of  $\Lambda - \delta\delta\delta$  (1), 68 of  $\Lambda - \delta\delta\delta \cdots 2\text{Cl}^-$  (2), 69 of  $\Lambda - \delta\delta\delta \cdots 3\text{Cl}^-$  (3) and 75 of  $\Lambda - \delta\delta\delta \cdots 5\text{Cl}^-$  (4). Since the two modes have  $A_2$  symmetry only the non-zero Z Cartesian components are shown. Units: EDTM ( $10^{-22}$  esu·cm), MDTM ( $10^{-24}$  esu·cm).

| E & M DTMs of Molecule 1 for NM 60 |         |        |         |        |         |        |         |        |         |        |         |        |
|------------------------------------|---------|--------|---------|--------|---------|--------|---------|--------|---------|--------|---------|--------|
| Frag.                              | E_nuc_X | E_el_X | E_nuc_Y | E_el_Y | E_nuc_Z | E_el_Z | M_nuc_X | M_el_X | M_nuc_Y | M_el_Y | M_nuc_Z | M_el_Z |
| All Axial:                         | -0.7    | 0.5    | -0.0    | -0.1   | 127.7   | -82.1  | -2.3    | 0.8    | -3.6    | 1.4    | 275.2   | -311.5 |
| All Equat:                         | -0.2    | 0.2    | -0.0    | 0.1    | 220.7   | -198.9 | 0.3     | -0.0   | 0.5     | -0.2   | 252.4   | -59.2  |
| REST:                              | 0.7     | -0.7   | -0.0    | 0.2    | -8.9    | 29.2   | 1.9     | -1.8   | 3.2     | -3.1   | -276.2  | 342.3  |
| TOTAL:                             | -0.2    | 0.1    | -0.1    | 0.2    | 339.5   | -251.8 | -0.1    | -1.0   | 0.1     | -1.9   | 251.4   | -28.4  |

  

| E & M DTMs of Molecule 2 for NM 68 |         |        |         |        |         |        |         |        |         |        |         |        |
|------------------------------------|---------|--------|---------|--------|---------|--------|---------|--------|---------|--------|---------|--------|
| Frag.                              | E_nuc_X | E_el_X | E_nuc_Y | E_el_Y | E_nuc_Z | E_el_Z | M_nuc_X | M_el_X | M_nuc_Y | M_el_Y | M_nuc_Z | M_el_Z |
| All Axial:                         | 2.4     | -1.9   | 9.9     | -8.1   | 285.1   | -481.6 | -2.3    | 0.9    | -2.2    | 3.9    | 121.7   | -181.1 |
| All Equat:                         | -1.1    | 1.1    | -7.9    | 7.4    | 172.7   | -155.7 | -0.3    | 0.3    | -0.9    | 0.9    | 328.8   | -112.3 |
| REST:                              | -0.4    | 0.6    | -2.1    | 2.9    | -72.4   | 71.6   | 2.5     | -2.4   | 4.3     | -3.7   | -215.2  | 285.4  |
| TOTAL:                             | 0.8     | -0.3   | -0.2    | 2.1    | 385.3   | -565.7 | 0.0     | -1.2   | 1.2     | 1.1    | 235.3   | -8.0   |

  

| E & M DTMs of Molecule 3 for NM 69 |         |        |         |        |         |        |         |        |         |        |         |        |
|------------------------------------|---------|--------|---------|--------|---------|--------|---------|--------|---------|--------|---------|--------|
| Frag.                              | E_nuc_X | E_el_X | E_nuc_Y | E_el_Y | E_nuc_Z | E_el_Z | M_nuc_X | M_el_X | M_nuc_Y | M_el_Y | M_nuc_Z | M_el_Z |
| All Axial:                         | -2.4    | 2.2    | -3.2    | 2.9    | 100.6   | -57.7  | -5.3    | 2.1    | -9.2    | 3.8    | 300.1   | -312.4 |
| All Equat:                         | -0.1    | 0.6    | -0.5    | 1.2    | 305.9   | -308.5 | 0.9     | -0.4   | 1.7     | -0.7   | 281.4   | -153.5 |
| REST:                              | 1.8     | -2.2   | 2.5     | -3.0   | -45.9   | 80.7   | 4.3     | -4.4   | 7.6     | -7.9   | -378.5  | 464.6  |
| TOTAL:                             | -0.7    | 0.6    | -1.3    | 1.2    | 360.6   | -285.5 | -0.1    | -2.7   | 0.1     | -4.8   | 203.1   | -1.3   |

  

| E & M DTMs of Molecule 4 for NM 75 |         |        |         |        |         |        |         |        |         |        |         |        |
|------------------------------------|---------|--------|---------|--------|---------|--------|---------|--------|---------|--------|---------|--------|
| Frag.                              | E_nuc_X | E_el_X | E_nuc_Y | E_el_Y | E_nuc_Z | E_el_Z | M_nuc_X | M_el_X | M_nuc_Y | M_el_Y | M_nuc_Z | M_el_Z |
| All Axial:                         | 0.2     | -0.1   | 0.5     | -0.3   | 227.9   | -378.9 | -2.1    | 0.6    | -3.5    | 1.2    | 211.6   | -248.7 |
| All Equat:                         | -0.3    | 0.2    | -1.7    | 1.8    | 313.9   | -299.1 | 0.3     | -0.1   | 0.6     | -0.1   | 257.6   | -107.9 |
| REST:                              | 0.4     | -0.4   | 0.8     | -0.7   | -45.5   | 70.2   | 1.9     | -1.9   | 3.0     | -3.4   | -279.2  | 320.3  |
| TOTAL:                             | 0.3     | -0.2   | -0.4    | 0.8    | 496.3   | -607.8 | 0.1     | -1.4   | 0.1     | -2.3   | 190.0   | -36.3  |

**Table 3:** Comparison of the Cartesian components of the electronic (el) and nuclear (nuc) components of the EDTM and MDTM of the modes: 82 of  $\Lambda - \delta\delta\delta$  (1), 88 of  $\Lambda - \delta\delta\delta \cdots 2\text{Cl}^-$  (2), 91 of  $\Lambda - \delta\delta\delta \cdots 3\text{Cl}^-$  (3) and 97 of  $\Lambda - \delta\delta\delta \cdots 5\text{Cl}^-$  (4). Since the two modes have  $A_2$  symmetry only the non-zero Z Cartesian components are shown. Units: EDTM ( $10^{-22}$  esu·cm), MDTM ( $10^{-24}$  esu·cm).

| E & M DTMs of Molecule 1 for NM 82 |         |        |         |        |         |        |         |        |         |        |         |        |  |
|------------------------------------|---------|--------|---------|--------|---------|--------|---------|--------|---------|--------|---------|--------|--|
| Frag.                              | E_nuc_X | E_el_X | E_nuc_Y | E_el_Y | E_nuc_Z | E_el_Z | M_nuc_X | M_el_X | M_nuc_Y | M_el_Y | M_nuc_Z | M_el_Z |  |
| All Axial:                         | -1.0    | 0.9    | -0.2    | 0.2    | -74.6   | 64.7   | 0.6     | -0.3   | 0.7     | -0.5   | 567.7   | -470.8 |  |
| All Equat:                         | -0.3    | 0.2    | 0.0     | -0.1   | -772.3  | 667.5  | -1.5    | 1.0    | -0.9    | 0.6    | 351.6   | -248.2 |  |
| REST:                              | 0.7     | -0.7   | 0.0     | -0.0   | 440.6   | -453.0 | 0.5     | -0.6   | 0.1     | -0.1   | -440.8  | 521.1  |  |
| TOTAL:                             | -0.6    | 0.4    | -0.2    | 0.1    | -406.3  | 279.1  | -0.5    | 0.2    | -0.1    | -0.0   | 478.5   | -197.9 |  |

  

| E & M DTMs of Molecule 2 for NM 88 |         |        |         |        |         |        |         |        |         |        |         |        |  |
|------------------------------------|---------|--------|---------|--------|---------|--------|---------|--------|---------|--------|---------|--------|--|
| Frag.                              | E_nuc_X | E_el_X | E_nuc_Y | E_el_Y | E_nuc_Z | E_el_Z | M_nuc_X | M_el_X | M_nuc_Y | M_el_Y | M_nuc_Z | M_el_Z |  |
| All Axial:                         | 0.9     | -0.9   | 7.2     | -7.0   | -123.7  | 155.8  | -2.3    | 2.4    | -5.3    | 4.1    | 574.9   | -493.6 |  |
| All Equat:                         | 0.9     | -0.9   | 3.3     | -3.1   | -635.9  | 565.7  | 1.4     | -0.6   | 7.7     | -4.8   | 331.0   | -218.1 |  |
| REST:                              | -1.0    | 1.0    | -5.7    | 5.7    | 388.7   | -419.1 | 0.5     | -0.4   | -1.1    | 2.1    | -437.3  | 520.3  |  |
| TOTAL:                             | 0.8     | -0.8   | 4.9     | -4.3   | -370.8  | 302.4  | -0.4    | 1.4    | 1.3     | 1.4    | 468.7   | -191.4 |  |

  

| E & M DTMs of Molecule 3 for NM 91 |         |        |         |        |         |        |         |        |         |        |         |        |  |
|------------------------------------|---------|--------|---------|--------|---------|--------|---------|--------|---------|--------|---------|--------|--|
| Frag.                              | E_nuc_X | E_el_X | E_nuc_Y | E_el_Y | E_nuc_Z | E_el_Z | M_nuc_X | M_el_X | M_nuc_Y | M_el_Y | M_nuc_Z | M_el_Z |  |
| All Axial:                         | 0.0     | -0.0   | -1.7    | 1.6    | -3.1    | 6.3    | -0.5    | 0.3    | -0.7    | 0.5    | 435.3   | -392.4 |  |
| All Equat:                         | -0.5    | 0.4    | -1.3    | 1.5    | -852.4  | 768.1  | 0.6     | -0.2   | -1.3    | 1.3    | 519.9   | -681.3 |  |
| REST:                              | 0.2     | -0.2   | 1.6     | -1.8   | 466.1   | -466.9 | -0.0    | 0.0    | 0.9     | -1.2   | -459.9  | 520.8  |  |
| TOTAL:                             | -0.2    | 0.1    | -1.4    | 1.3    | -389.5  | 307.5  | 0.0     | 0.1    | -1.0    | 0.7    | 495.3   | -552.9 |  |

  

| E & M DTMs of Molecule 4 for NM 97 |         |        |         |        |         |        |         |        |         |        |         |        |  |
|------------------------------------|---------|--------|---------|--------|---------|--------|---------|--------|---------|--------|---------|--------|--|
| Frag.                              | E_nuc_X | E_el_X | E_nuc_Y | E_el_Y | E_nuc_Z | E_el_Z | M_nuc_X | M_el_X | M_nuc_Y | M_el_Y | M_nuc_Z | M_el_Z |  |
| All Axial:                         | 1.0     | -1.0   | 2.9     | -2.8   | -48.8   | 110.7  | -1.6    | 1.1    | -0.2    | -0.4   | 506.7   | -456.9 |  |
| All Equat:                         | 0.6     | -0.6   | 1.7     | -2.0   | -739.6  | 664.5  | 1.9     | -0.9   | 3.2     | -2.2   | 476.6   | -527.0 |  |
| REST:                              | -0.9    | 0.9    | -2.5    | 2.6    | 418.9   | -440.5 | -0.1    | 0.1    | -1.4    | 1.8    | -473.8  | 551.5  |  |
| TOTAL:                             | 0.7     | -0.6   | 2.1     | -2.2   | -369.6  | 334.7  | 0.1     | 0.3    | 1.6     | -0.9   | 509.6   | -432.4 |  |

**Table 4:** Comparison of the Cartesian components of the electronic (el) and nuclear (nuc) components of the EDTM and MDTM of the modes: 109 of  $\Lambda - \delta\delta\delta$  (1) and 123 of  $\Lambda - \delta\delta\delta \cdots 5\text{Cl}^-$  (4). Since the two modes have  $A_2$  symmetry only the non-zero Z Cartesian components are shown. Units: EDTM ( $10^{-22}$  esu·cm), MDTM ( $10^{-24}$  esu·cm).

| E & M DTMs of Molecule 1 for NM 107 |         |        |         |        |         |        |         |        |         |        |         |        |
|-------------------------------------|---------|--------|---------|--------|---------|--------|---------|--------|---------|--------|---------|--------|
| Frag.                               | E_nuc_X | E_el_X | E_nuc_Y | E_el_Y | E_nuc_Z | E_el_Z | M_nuc_X | M_el_X | M_nuc_Y | M_el_Y | M_nuc_Z | M_el_Z |
| All Axial:                          | 7.4     | -11.8  | -72.6   | 79.8   | 6.8     | -5.5   | 204.2   | -186.2 | 476.9   | -360.4 | 0.6     | -0.1   |
| All Equat:                          | -40.8   | 38.9   | -306.9  | 255.6  | 0.4     | -0.5   | 123.0   | -114.6 | -110.8  | 97.3   | 6.2     | -4.6   |
| REST:                               | 16.3    | -16.6  | 186.1   | -184.1 | -3.6    | 3.6    | -162.2  | 200.5  | -180.3  | 200.4  | -3.2    | 3.5    |
| TOTAL:                              | -17.1   | 10.4   | -193.4  | 151.4  | 3.6     | -2.3   | 165.0   | -100.3 | 185.8   | -62.7  | 3.6     | -1.2   |

  

| E & M DTMs of Molecule 4 for NM 124 |         |        |         |        |         |        |         |        |         |        |         |        |
|-------------------------------------|---------|--------|---------|--------|---------|--------|---------|--------|---------|--------|---------|--------|
| Frag.                               | E_nuc_X | E_el_X | E_nuc_Y | E_el_Y | E_nuc_Z | E_el_Z | M_nuc_X | M_el_X | M_nuc_Y | M_el_Y | M_nuc_Z | M_el_Z |
| All Axial:                          | -21.9   | 2.8    | -113.9  | 15.5   | 2.4     | -0.9   | 71.1    | 39.8   | 407.8   | 214.3  | 0.1     | -0.2   |
| All Equat:                          | -49.0   | 7.1    | -258.7  | 39.3   | -0.8    | -0.1   | -18.8   | 4.4    | -87.4   | 28.1   | -7.2    | 0.6    |
| REST:                               | 34.5    | -37.7  | 181.4   | -198.1 | -0.9    | 0.9    | -25.5   | 33.1   | -156.7  | 203.8  | 2.8     | -3.6   |
| TOTAL:                              | -36.4   | -27.8  | -191.2  | -143.3 | 0.7     | -0.0   | 26.8    | 77.3   | 163.8   | 446.2  | -4.2    | -3.2   |
