# Supplementary material for: Signatures of counter-ion association and hydrogen bonding in vibrational circular dichroism spectra
Source: Royal Society of Chemistry journal article supplement (doi:10.1039/c0cp02701d), 2011-01-01
Supplement: c0cp02701d_addcorr.doc [file c0cp02701d_addcorr.doc]

**ADDITIONS & CORRECTIONS www.rsc.org/pccp | Physical Chemistry Chemical Physics**

**Signatures of counter ion association and hydrogen bonding in vibrational circular dichroism spectra**

Valentin Paul Nicu, Mojgan Heshmat, Evert Jan Baerends

*Phys. Chem. Chem. Phys.*, 2011, **13**, 8811–8825 (DOI: 10.1039/c0cp02701d). ***Amendment published 10th October 2011.***

The authors regret that the following Acknowledgment has been inadvertently omitted:

This work was supported by the  Netherlands' Foundation for Scientific Research (VENI grant VPN), by the National Research School Combination "Catalysis by Design” (MH), and by the WCU (World Class University) program (EJB) through the Korea Science and Engineering Foundation funded by the Ministry of Education, Science and Technology of the Republic of Korea (Project No. R32-2008-000-10180-0).

The Royal Society of Chemistry apologises for these errors and any consequent inconvenience to authors and readers.

**Additions and corrections can be viewed online by accessing the original article to which they apply.**
